# Supplementary material for: Ecological Niche Modeling for the Prediction of the Geographic Distribution of Cutaneous Leishmaniasis in Tunisia
Source: PubMed Central journal article supplement (PMC4824228; doi:10.4269/ajtmh.15-0345), 2016-04-06
Supplement: SD5.pdf [file SD5.pdf]

## SUPPLEMENTAL APPENDIX 1

*Phlebotomus Papatasi* Occurrence Points Sampling Location

| Station | Latitude  | Longitude | District          |
|---------|-----------|-----------|-------------------|
| 1       | 35.386050 | 9.936200  | Bou Hajla         |
| 2       | 35.209883 | 9.988217  | Bou Hajla         |
| 3       | 35.279817 | 10.238217 | Bou Hajla         |
| 4       | 35.386050 | 9.936250  | Bou Hajla         |
| 5       | 35.255117 | 10.308050 | Chorbane          |
| 6       | 35.240800 | 10.305517 | Chorbane          |
| 7       | 33.489450 | 8.867800  | Douz              |
| 8       | 33.493633 | 8.866217  | Douz              |
| 9       | 35.168883 | 9.980150  | Echrarda          |
| 10      | 35.196850 | 9.996533  | Echrarda          |
| 11      | 35.190383 | 10.001833 | Echrarda          |
| 12      | 35.116433 | 10.080283 | Echrarda          |
| 13      | 35.110367 | 10.099350 | Echrarda          |
| 14      | 35.102700 | 10.098367 | Echrarda          |
| 15      | 35.197500 | 10.036717 | Echrarda          |
| 16      | 35.192633 | 10.067350 | Echrarda          |
| 17      | 33.168050 | 8.750567  | Faouar            |
| 18      | 33.356500 | 8.750050  | Faouar            |
| 19      | 33.350883 | 8.747883  | Faouar            |
| 20      | 33.361433 | 8.663483  | Faouar            |
| 21      | 33.357167 | 8.666233  | Faouar            |
| 22      | 33.354617 | 8.171467  | Faouar            |
| 23      | 33.367350 | 8.684433  | Faouar            |
| 24      | 33.371683 | 8.674767  | Faouar            |
| 25      | 33.432200 | 8.826600  | Faouar            |
| 26      | 33.322083 | 8.040267  | Faouar            |
| 27      | 33.314933 | 8.032083  | Faouar            |
| 28      | 33.318483 | 8.024050  | Faouar            |
| 29      | 33.349883 | 7.778050  | Faouar            |
| 30      | 33.322496 | 7.955246  | Faouar            |
| 31      | 34.311900 | 8.475083  | Gafsa Sud         |
| 32      | 34.325233 | 8.536400  | Gafsa Sud         |
| 33      | 34.317733 | 8.794633  | Mdhila            |
| 34      | 34.297167 | 8.762683  | Mdhila            |
| 35      | 34.302750 | 8.752833  | Mdhila            |
| 36      | 34.261500 | 8.731750  | Mdhila            |
| 37      | 36.659124 | 9.619117  | Medjez El Bab     |
| 38      | 34.777933 | 9.568117  | Meknassy          |
| 39      | 34.760167 | 9.580150  | Meknassy          |
| 40      | 34.617100 | 9.581333  | Meknassy          |
| 41      | 34.653250 | 9.558333  | Meknassy          |
| 42      | 35.184191 | 10.180836 | Menzel Chaker     |
| 43      | 34.307017 | 8.419450  | Métlaoui          |
| 44      | 34.302517 | 8.420600  | Métlaoui          |
| 45      | 34.307933 | 8.392150  | Métlaoui          |
| 46      | 35.233883 | 9.778550  | Nasrallah         |
| 47      | 35.213133 | 9.713083  | Nasrallah         |
| 48      | 35.222700 | 9.718200  | Nasrallah         |
| 49      | 35.231767 | 9.732050  | Nasrallah         |
| 50      | 35.275700 | 9.736017  | Nasrallah         |
| 51      | 35.362217 | 9.729483  | Nasrallah         |
| 52      | 35.292817 | 9.752583  | Nasrallah         |
| 53      | 35.352583 | 9.825467  | Nasrallah         |
| 54      | 35.450483 | 10.286100 | Ouled Chamekh     |
| 55      | 35.423150 | 10.307100 | Ouled Chamekh     |
| 56      | 35.169800 | 9.957833  | Ouled Haffouz     |
| 57      | 35.063017 | 9.818350  | Ouled Haffouz     |
| 58      | 35.028817 | 10.060267 | Regueb            |
| 59      | 35.057917 | 9.507183  | Sidi Bouzid Est   |
| 60      | 35.058950 | 9.726083  | Sidi Bouzid Est   |
| 61      | 35.044500 | 9.729183  | Sidi Bouzid Est   |
| 62      | 35.049900 | 9.721200  | Sidi Bouzid Est   |
| 63      | 35.055083 | 9.819067  | Sidi Bouzid Est   |
| 64      | 35.044533 | 9.825233  | Sidi Bouzid Est   |
| 65      | 35.197717 | 9.453333  | Sidi Bouzid Ouest |
| 66      | 35.619767 | 10.294917 | Sidi El Hani      |
| 67      | 35.618550 | 10.304317 | Sidi El Hani      |
| 68      | 35.657367 | 10.298383 | Sidi El Hani      |
| 69      | 35.750683 | 10.330833 | Sidi El Hani      |
| 70      | 35.716971 | 10.346947 | Sidi El Hani      |

(continued)

## SUPPLEMENTAL APPENDIX 1

## Continued

| Station | Latitude  | Longitude | District   |
|---------|-----------|-----------|------------|
| 71      | 34.791133 | 9.574900  | Souk Jedid |
| 72      | 34.790583 | 9.575400  | Souk Jedid |
| 73      | 34.822267 | 9.599650  | Souk Jedid |
| 74      | 34.805133 | 9.602583  | Souk Jedid |
| 75      | 34.786083 | 9.558450  | Souk Jedid |
| 76      | 34.797533 | 9.549317  | Souk Jedid |
| 77      | 34.786650 | 9.541633  | Souk Jedid |
| 78      | 34.802783 | 9.524567  | Souk Jedid |
| 79      | 34.803933 | 9.536333  | Souk Jedid |
| 80      | 34.820533 | 9.539917  | Souk Jedid |
| 81      | 34.877050 | 9.525083  | Souk Jedid |
| 82      | 34.878033 | 9.536133  | Souk Jedid |
| 83      | 34.875483 | 9.540117  | Souk Jedid |
| 84      | 34.881483 | 9.519550  | Souk Jedid |
| 85      | 34.886883 | 9.504917  | Souk Jedid |
| 86      | 34.886650 | 9.499683  | Souk Jedid |

SUPPLEMENTAL APPENDIX 2

Cutaneous leishmaniasis cases caused by *Leishmania major* occurrence points sampling location

| Station | Latitude | Longitude | Governorate | District  |
|---------|----------|-----------|-------------|-----------|
| 1       | 34.4212  | 8.7709    | Gafsa       | Gafsa Sud |
| 2       | 34.3891  | 8.7184    | Gafsa       | Gafsa Sud |
| 3       | 34.3887  | 8.7193    | Gafsa       | Gafsa Sud |
| 4       | 34.2897  | 8.7527    | Gafsa       | Mdhila    |
| 5       | 34.2829  | 8.7497    | Gafsa       | Mdhila    |
| 6       | 34.3009  | 8.7560    | Gafsa       | Mdhila    |
| 7       | 34.2941  | 8.7581    | Gafsa       | Mdhila    |
| 8       | 34.2621  | 8.7260    | Gafsa       | Mdhila    |
| 9       | 34.2963  | 8.7621    | Gafsa       | Mdhila    |
| 10      | 34.2928  | 8.7537    | Gafsa       | Mdhila    |
| 11      | 34.2927  | 8.7569    | Gafsa       | Mdhila    |
| 12      | 34.2996  | 8.7598    | Gafsa       | Mdhila    |
| 13      | 34.2786  | 8.7460    | Gafsa       | Mdhila    |
| 14      | 34.2986  | 8.7603    | Gafsa       | Mdhila    |
| 15      | 34.2882  | 8.7537    | Gafsa       | Mdhila    |
| 16      | 34.2919  | 8.7578    | Gafsa       | Mdhila    |
| 17      | 34.2817  | 8.7461    | Gafsa       | Mdhila    |
| 18      | 34.2809  | 8.7478    | Gafsa       | Mdhila    |
| 19      | 34.2610  | 8.7309    | Gafsa       | Mdhila    |
| 20      | 34.2936  | 8.7619    | Gafsa       | Mdhila    |
| 21      | 34.2810  | 8.7475    | Gafsa       | Mdhila    |
| 22      | 34.2851  | 8.7455    | Gafsa       | Mdhila    |
| 23      | 34.3116  | 8.3887    | Gafsa       | Métlaoui  |
| 24      | 34.3398  | 8.4067    | Gafsa       | Métlaoui  |
| 25      | 34.3196  | 8.4113    | Gafsa       | Métlaoui  |
| 26      | 34.3068  | 8.4151    | Gafsa       | Métlaoui  |
| 27      | 34.3041  | 8.4127    | Gafsa       | Métlaoui  |
| 28      | 34.3075  | 8.4100    | Gafsa       | Métlaoui  |
| 29      | 34.3103  | 8.3844    | Gafsa       | Métlaoui  |
| 30      | 34.3037  | 8.4200    | Gafsa       | Métlaoui  |
| 31      | 34.3072  | 8.4152    | Gafsa       | Métlaoui  |
| 32      | 34.3199  | 8.3806    | Gafsa       | Métlaoui  |
| 33      | 34.3106  | 8.3838    | Gafsa       | Métlaoui  |
| 34      | 34.3227  | 8.4091    | Gafsa       | Métlaoui  |
| 35      | 34.3328  | 8.4032    | Gafsa       | Métlaoui  |
| 36      | 34.3223  | 8.4105    | Gafsa       | Métlaoui  |
| 37      | 34.3063  | 8.4160    | Gafsa       | Métlaoui  |
| 38      | 34.3261  | 8.3994    | Gafsa       | Métlaoui  |
| 39      | 34.3097  | 8.3958    | Gafsa       | Métlaoui  |
| 40      | 34.3369  | 8.3988    | Gafsa       | Métlaoui  |
| 41      | 34.3107  | 8.3955    | Gafsa       | Métlaoui  |
| 42      | 34.3119  | 8.3944    | Gafsa       | Métlaoui  |
| 43      | 34.3217  | 8.4127    | Gafsa       | Métlaoui  |
| 44      | 34.3095  | 8.3958    | Gafsa       | Métlaoui  |
| 45      | 34.3259  | 8.4062    | Gafsa       | Métlaoui  |
| 46      | 34.3251  | 8.4077    | Gafsa       | Métlaoui  |
| 47      | 34.3095  | 8.4198    | Gafsa       | Métlaoui  |
| 48      | 34.3209  | 8.3913    | Gafsa       | Métlaoui  |
| 49      | 34.3237  | 8.4086    | Gafsa       | Métlaoui  |
| 50      | 34.3036  | 8.4192    | Gafsa       | Métlaoui  |
| 51      | 34.3101  | 8.3983    | Gafsa       | Métlaoui  |
| 52      | 34.3148  | 8.4176    | Gafsa       | Métlaoui  |
| 53      | 34.3220  | 8.4104    | Gafsa       | Métlaoui  |
| 54      | 34.3176  | 8.3896    | Gafsa       | Métlaoui  |
| 55      | 34.3265  | 8.4062    | Gafsa       | Métlaoui  |
| 56      | 34.3126  | 8.4082    | Gafsa       | Métlaoui  |
| 57      | 34.3064  | 8.4145    | Gafsa       | Métlaoui  |
| 58      | 34.3132  | 8.4056    | Gafsa       | Métlaoui  |
| 59      | 34.3218  | 8.4117    | Gafsa       | Métlaoui  |
| 60      | 34.3120  | 8.4073    | Gafsa       | Métlaoui  |
| 61      | 34.3033  | 8.4127    | Gafsa       | Métlaoui  |
| 62      | 34.3135  | 8.4194    | Gafsa       | Métlaoui  |
| 63      | 34.3106  | 8.3995    | Gafsa       | Métlaoui  |
| 64      | 34.3299  | 8.3990    | Gafsa       | Métlaoui  |
| 65      | 34.3173  | 8.3937    | Gafsa       | Métlaoui  |
| 66      | 34.3186  | 8.4003    | Gafsa       | Métlaoui  |
| 67      | 34.3128  | 8.4140    | Gafsa       | Métlaoui  |
| 68      | 34.3109  | 8.4044    | Gafsa       | Métlaoui  |
| 69      | 34.3102  | 8.4161    | Gafsa       | Métlaoui  |

(continued)

SUPPLEMENTAL APPENDIX 2

Continued

| Station | Latitude | Longitude | Governorate | District  |
|---------|----------|-----------|-------------|-----------|
| 70      | 34.3055  | 8.4194    | Gafsa       | Métlaoui  |
| 71      | 34.3223  | 8.4084    | Gafsa       | Métlaoui  |
| 72      | 34.3090  | 8.3865    | Gafsa       | Métlaoui  |
| 73      | 34.3259  | 8.4016    | Gafsa       | Métlaoui  |
| 74      | 34.3157  | 8.3825    | Gafsa       | Métlaoui  |
| 75      | 34.3203  | 8.4097    | Gafsa       | Métlaoui  |
| 76      | 34.3103  | 8.3844    | Gafsa       | Métlaoui  |
| 77      | 34.3111  | 8.4163    | Gafsa       | Métlaoui  |
| 78      | 34.3345  | 8.4029    | Gafsa       | Métlaoui  |
| 79      | 34.3127  | 8.4175    | Gafsa       | Métlaoui  |
| 80      | 34.3273  | 8.4080    | Gafsa       | Métlaoui  |
| 81      | 34.3163  | 8.3898    | Gafsa       | Métlaoui  |
| 82      | 34.3401  | 8.4061    | Gafsa       | Métlaoui  |
| 83      | 34.3377  | 8.3988    | Gafsa       | Métlaoui  |
| 84      | 34.3365  | 8.3991    | Gafsa       | Métlaoui  |
| 85      | 34.3058  | 8.4204    | Gafsa       | Métlaoui  |
| 86      | 34.3105  | 8.4178    | Gafsa       | Métlaoui  |
| 87      | 34.3109  | 8.3958    | Gafsa       | Métlaoui  |
| 88      | 34.3292  | 8.3969    | Gafsa       | Métlaoui  |
| 89      | 34.3345  | 8.4066    | Gafsa       | Métlaoui  |
| 90      | 34.3111  | 8.3851    | Gafsa       | Métlaoui  |
| 91      | 34.3120  | 8.3886    | Gafsa       | Métlaoui  |
| 92      | 34.3101  | 8.4043    | Gafsa       | Métlaoui  |
| 93      | 34.3279  | 8.4052    | Gafsa       | Métlaoui  |
| 94      | 34.3250  | 8.4097    | Gafsa       | Métlaoui  |
| 95      | 34.3102  | 8.4108    | Gafsa       | Métlaoui  |
| 96      | 34.3132  | 8.3901    | Gafsa       | Métlaoui  |
| 97      | 34.3238  | 8.4053    | Gafsa       | Métlaoui  |
| 98      | 34.3168  | 8.4078    | Gafsa       | Métlaoui  |
| 99      | 34.3261  | 8.3833    | Gafsa       | Métlaoui  |
| 100     | 34.3070  | 8.4254    | Gafsa       | Métlaoui  |
| 101     | 34.3302  | 8.4037    | Gafsa       | Métlaoui  |
| 102     | 34.3361  | 8.3937    | Gafsa       | Métlaoui  |
| 103     | 34.3191  | 8.4046    | Gafsa       | Métlaoui  |
| 104     | 34.3376  | 8.3994    | Gafsa       | Métlaoui  |
| 105     | 35.2916  | 9.9610    | Kairouan    | Bou Hajla |
| 106     | 35.1787  | 10.1637   | Kairouan    | Chrarda   |
| 107     | 35.1508  | 10.1052   | Kairouan    | Chrarda   |
| 108     | 35.0864  | 10.0627   | Kairouan    | Chrarda   |
| 109     | 35.1579  | 10.0378   | Kairouan    | Chrarda   |
| 110     | 35.1876  | 10.1285   | Kairouan    | Chrarda   |
| 111     | 35.1955  | 10.1515   | Kairouan    | Chrarda   |
| 112     | 35.1623  | 10.0618   | Kairouan    | Chrarda   |
| 113     | 35.1676  | 10.1580   | Kairouan    | Chrarda   |
| 114     | 35.1945  | 10.0712   | Kairouan    | Chrarda   |
| 115     | 35.1769  | 10.1116   | Kairouan    | Chrarda   |
| 116     | 35.2114  | 10.0058   | Kairouan    | Chrarda   |
| 117     | 35.1809  | 10.0908   | Kairouan    | Chrarda   |
| 118     | 35.1695  | 10.0329   | Kairouan    | Chrarda   |
| 119     | 35.1302  | 10.0803   | Kairouan    | Chrarda   |
| 120     | 35.1349  | 10.0736   | Kairouan    | Chrarda   |
| 121     | 35.1576  | 10.0853   | Kairouan    | Chrarda   |
| 122     | 35.1859  | 10.1564   | Kairouan    | Chrarda   |
| 123     | 35.2287  | 10.1287   | Kairouan    | Chrarda   |
| 124     | 35.2025  | 10.1477   | Kairouan    | Chrarda   |
| 125     | 35.1370  | 10.0864   | Kairouan    | Chrarda   |
| 126     | 35.1696  | 10.0098   | Kairouan    | Chrarda   |
| 127     | 35.2423  | 10.0136   | Kairouan    | Chrarda   |
| 128     | 35.1684  | 10.0897   | Kairouan    | Chrarda   |
| 129     | 35.2380  | 10.0148   | Kairouan    | Chrarda   |
| 130     | 35.1800  | 10.0800   | Kairouan    | Chrarda   |
| 131     | 35.1690  | 9.9377    | Kairouan    | Chrarda   |
| 132     | 35.1215  | 10.0296   | Kairouan    | Chrarda   |
| 133     | 35.1938  | 10.1304   | Kairouan    | Chrarda   |
| 134     | 35.0656  | 10.0233   | Kairouan    | Chrarda   |
| 135     | 35.1002  | 10.0329   | Kairouan    | Chrarda   |
| 136     | 35.1156  | 10.0356   | Kairouan    | Chrarda   |
| 137     | 35.1594  | 10.0385   | Kairouan    | Chrarda   |
| 138     | 35.1723  | 9.9671    | Kairouan    | Chrarda   |
| 139     | 35.1569  | 10.1494   | Kairouan    | Chrarda   |

(continued)

## SUPPLEMENTAL APPENDIX 2

## Continued

| Station | Latitude | Longitude | Governorate  | District        |
|---------|----------|-----------|--------------|-----------------|
| 140     | 35.2082  | 9.9876    | Kairouan     | Chrarda         |
| 141     | 35.1468  | 9.9889    | Kairouan     | Chrarda         |
| 142     | 35.1937  | 10.0042   | Kairouan     | Chrarda         |
| 143     | 35.1190  | 10.0308   | Kairouan     | Chrarda         |
| 144     | 35.1386  | 10.0745   | Kairouan     | Chrarda         |
| 145     | 35.1889  | 10.1558   | Kairouan     | Chrarda         |
| 146     | 35.2080  | 9.9867    | Kairouan     | Chrarda         |
| 147     | 35.0957  | 10.0580   | Kairouan     | Chrarda         |
| 148     | 35.1826  | 9.9700    | Kairouan     | Chrarda         |
| 149     | 35.1677  | 10.1136   | Kairouan     | Chrarda         |
| 150     | 35.1952  | 9.9762    | Kairouan     | Chrarda         |
| 151     | 35.1399  | 10.0923   | Kairouan     | Chrarda         |
| 152     | 35.1064  | 10.0606   | Kairouan     | Chrarda         |
| 153     | 35.1789  | 9.9756    | Kairouan     | Chrarda         |
| 154     | 35.1082  | 10.0150   | Kairouan     | Chrarda         |
| 155     | 35.2024  | 10.1471   | Kairouan     | Chrarda         |
| 156     | 35.2086  | 9.9899    | Kairouan     | Chrarda         |
| 157     | 35.1475  | 10.0726   | Kairouan     | Chrarda         |
| 158     | 35.1433  | 10.0726   | Kairouan     | Chrarda         |
| 159     | 35.1336  | 10.0680   | Kairouan     | Chrarda         |
| 160     | 35.1854  | 10.0905   | Kairouan     | Chrarda         |
| 161     | 35.1994  | 10.0832   | Kairouan     | Chrarda         |
| 162     | 35.1750  | 10.1552   | Kairouan     | Chrarda         |
| 163     | 35.2040  | 10.1299   | Kairouan     | Chrarda         |
| 164     | 35.1498  | 10.0871   | Kairouan     | Chrarda         |
| 165     | 35.1774  | 10.0589   | Kairouan     | Chrarda         |
| 166     | 35.1663  | 10.1390   | Kairouan     | Chrarda         |
| 167     | 35.1495  | 10.0871   | Kairouan     | Chrarda         |
| 168     | 35.2352  | 9.7781    | Kairouan     | Nasrallah       |
| 169     | 35.2656  | 9.7930    | Kairouan     | Nasrallah       |
| 170     | 35.2607  | 9.8096    | Kairouan     | Nasrallah       |
| 171     | 35.2368  | 9.7968    | Kairouan     | Nasrallah       |
| 172     | 35.2302  | 9.7960    | Kairouan     | Nasrallah       |
| 173     | 35.2340  | 9.7783    | Kairouan     | Nasrallah       |
| 174     | 35.2559  | 9.8897    | Kairouan     | Nasrallah       |
| 175     | 35.2284  | 9.8161    | Kairouan     | Nasrallah       |
| 176     | 35.2097  | 9.8245    | Kairouan     | Nasrallah       |
| 177     | 35.3257  | 9.8359    | Kairouan     | Nasrallah       |
| 178     | 35.2531  | 9.8133    | Kairouan     | Nasrallah       |
| 179     | 35.2484  | 9.8081    | Kairouan     | Nasrallah       |
| 180     | 35.1972  | 9.8344    | Kairouan     | Nasrallah       |
| 181     | 35.0230  | 10.0755   | Sfax         | Menzel Chaker   |
| 182     | 35.1055  | 10.1102   | Sfax         | Menzel Chaker   |
| 183     | 35.1525  | 10.1634   | Sfax         | Menzel Chaker   |
| 184     | 35.1432  | 9.7195    | Sidi Bou Zid | Ouled Haffouz   |
| 185     | 35.0256  | 9.7934    | Sidi Bou Zid | Ouled Haffouz   |
| 186     | 35.0797  | 9.8751    | Sidi Bou Zid | Ouled Haffouz   |
| 187     | 35.1480  | 9.9414    | Sidi Bou Zid | Ouled Haffouz   |
| 188     | 35.1241  | 9.8817    | Sidi Bou Zid | Ouled Haffouz   |
| 189     | 35.0239  | 9.8109    | Sidi Bou Zid | Ouled Haffouz   |
| 190     | 35.0287  | 9.7815    | Sidi Bou Zid | Ouled Haffouz   |
| 191     | 35.1404  | 9.8561    | Sidi Bou Zid | Ouled Haffouz   |
| 192     | 35.0597  | 9.8416    | Sidi Bou Zid | Ouled Haffouz   |
| 193     | 35.1391  | 9.8563    | Sidi Bou Zid | Ouled Haffouz   |
| 194     | 35.0622  | 9.8383    | Sidi Bou Zid | Ouled Haffouz   |
| 195     | 35.0561  | 9.8433    | Sidi Bou Zid | Ouled Haffouz   |
| 196     | 35.1222  | 9.8638    | Sidi Bou Zid | Ouled Haffouz   |
| 197     | 35.1530  | 9.9311    | Sidi Bou Zid | Ouled Haffouz   |
| 198     | 35.1771  | 9.8479    | Sidi Bou Zid | Ouled Haffouz   |
| 199     | 35.1772  | 9.8478    | Sidi Bou Zid | Ouled Haffouz   |
| 200     | 35.0880  | 9.9229    | Sidi Bou Zid | Ouled Haffouz   |
| 201     | 35.0616  | 9.8566    | Sidi Bou Zid | Ouled Haffouz   |
| 202     | 35.0937  | 9.9645    | Sidi Bou Zid | Ouled Haffouz   |
| 203     | 35.1525  | 9.9539    | Sidi Bou Zid | Ouled Haffouz   |
| 204     | 35.1660  | 9.9671    | Sidi Bou Zid | Ouled Haffouz   |
| 205     | 35.1652  | 9.8533    | Sidi Bou Zid | Ouled Haffouz   |
| 206     | 35.0706  | 9.8745    | Sidi Bou Zid | Ouled Haffouz   |
| 207     | 35.0800  | 9.8715    | Sidi Bou Zid | Ouled Haffouz   |
| 208     | 35.0337  | 9.6990    | Sidi Bou Zid | Sidi Bouzid Est |
| 209     | 35.0330  | 9.4614    | Sidi Bou Zid | Sidi Bouzid Est |
| 210     | 35.0396  | 9.5806    | Sidi Bou Zid | Sidi Bouzid Est |
